# Supplementary material for: Limbic System Response to Psilocybin and Ketamine Administration in Rats: A Neurochemical and Behavioral Study
Source: Preprints.org preprint supplement (doi:10.20944/preprints202309.1649.v1), 2023-09-25

On each blot 2 animals (one cohort) were used from 8 different cohorts

**A blot**

|                       |      |
|-----------------------|------|
| Control               | 1, 2 |
| Psilocybin<br>2mg/kg  | 1, 2 |
| Psilocybin<br>10mg/kg | 1, 2 |
| Ketamine<br>10mg/kg   | 1, 2 |

**B blot**

|                       |      |
|-----------------------|------|
| Control               | 3, 4 |
| Psilocybin<br>2mg/kg  | 3, 4 |
| Psilocybin<br>10mg/kg | 3, 4 |
| Ketamine<br>10mg/kg   | 3, 4 |

**C blot**

|                       |      |
|-----------------------|------|
| Control               | 5, 6 |
| Psilocybin<br>2mg/kg  | 5, 6 |
| Psilocybin<br>10mg/kg | 5, 6 |
| Ketamine<br>10mg/kg   | 5, 6 |

**D blot**

|                       |      |
|-----------------------|------|
| Control               | 7, 8 |
| Psilocybin<br>2mg/kg  | 7, 8 |
| Psilocybin<br>10mg/kg | 7, 8 |
| Ketamine<br>10mg/kg   | 7, 8 |

**N=8**

# 5HT1A

## HIPPOCAMPUS

A blot (this blot in publication)

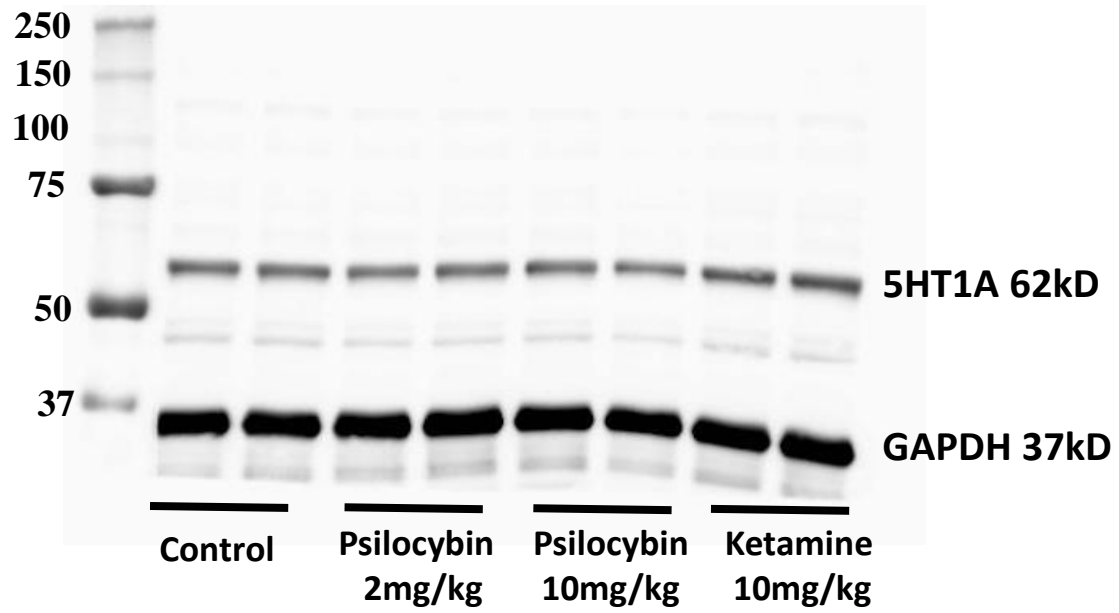

B blot

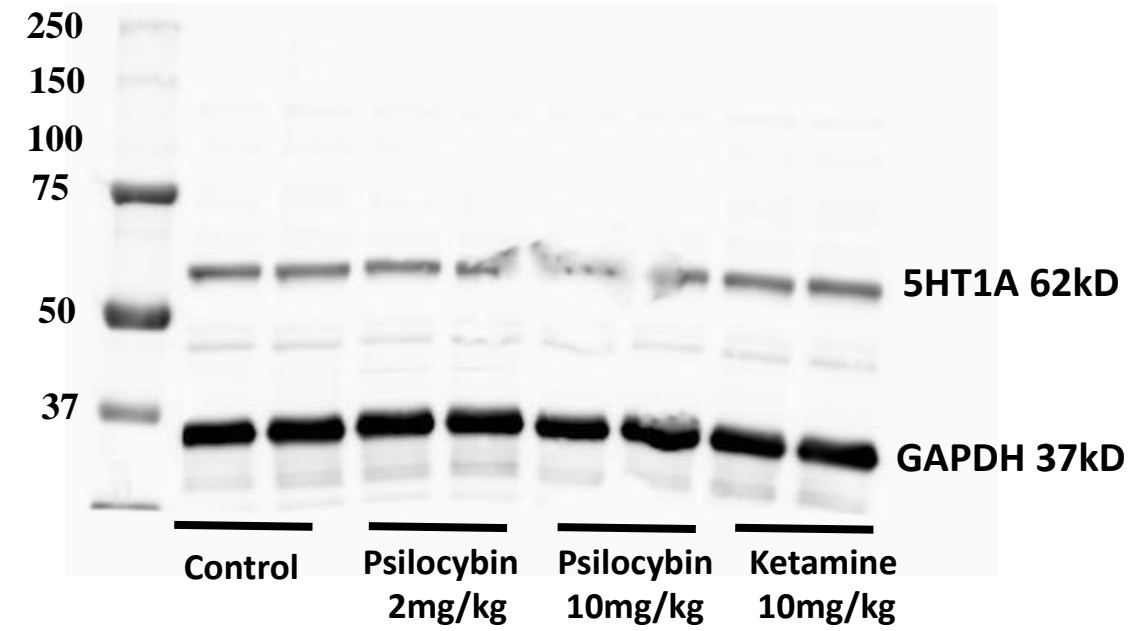

5HT1A

HIPPOCAMPUS

C blot

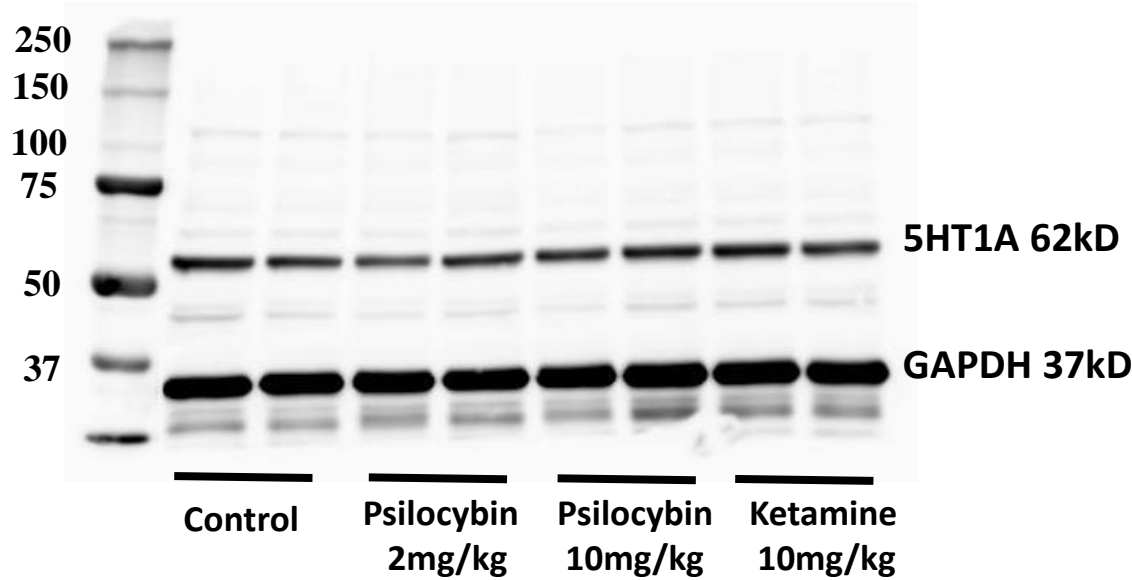

D blot

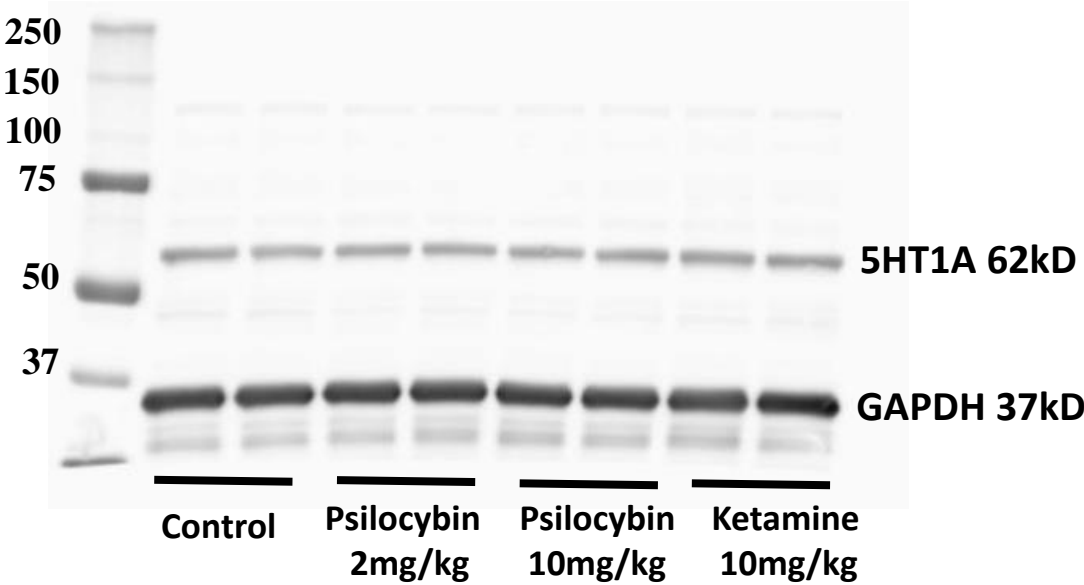

# HIPPOCAMPUS

## 5HT2A

A blot (this blot in publication)

B blot

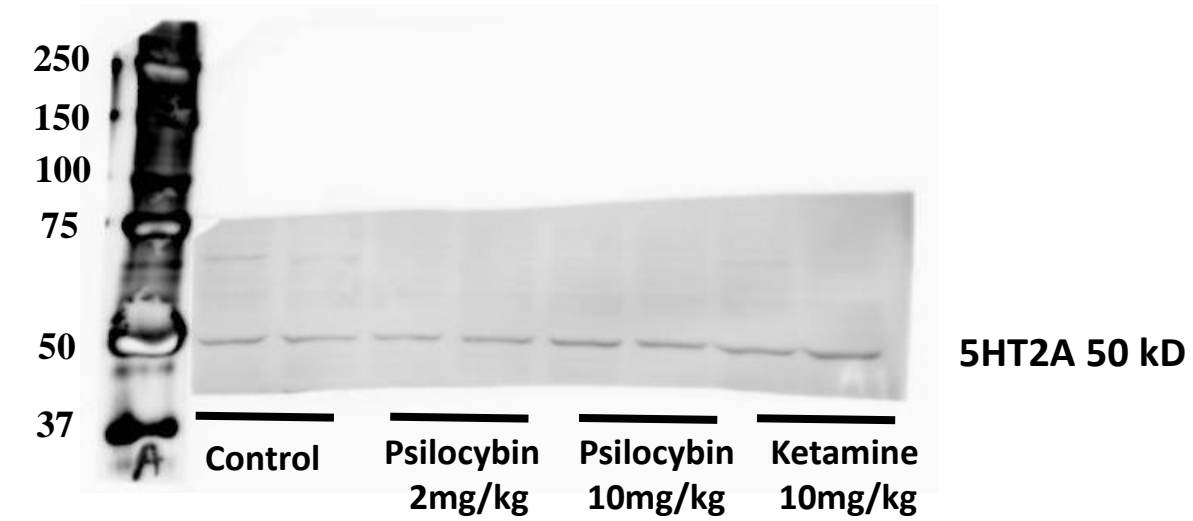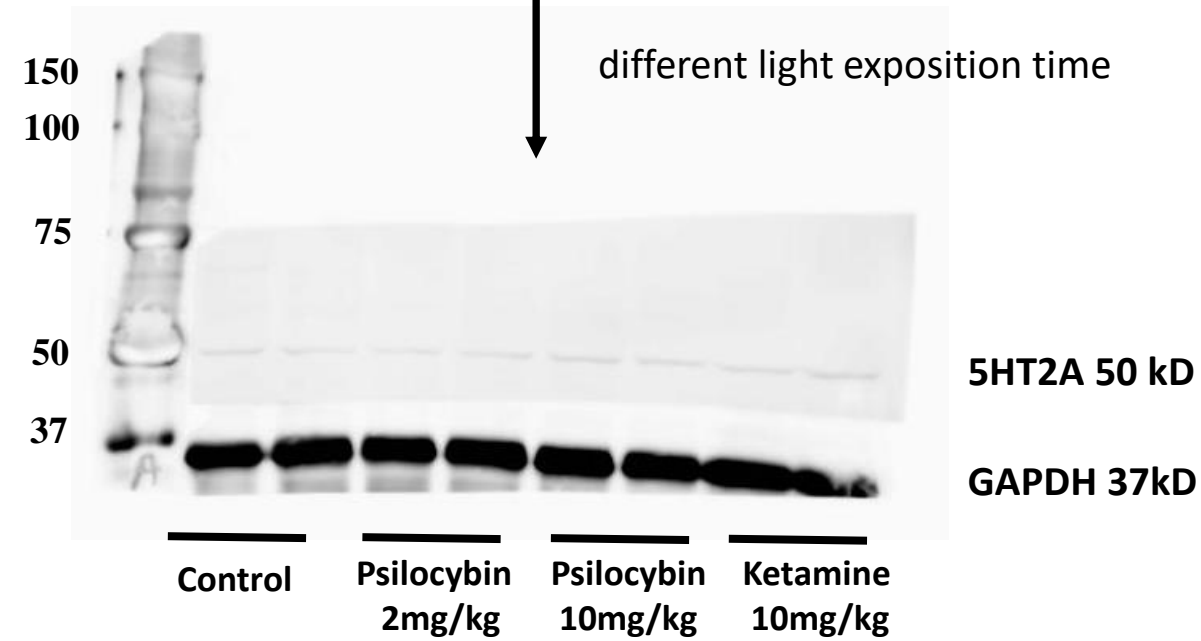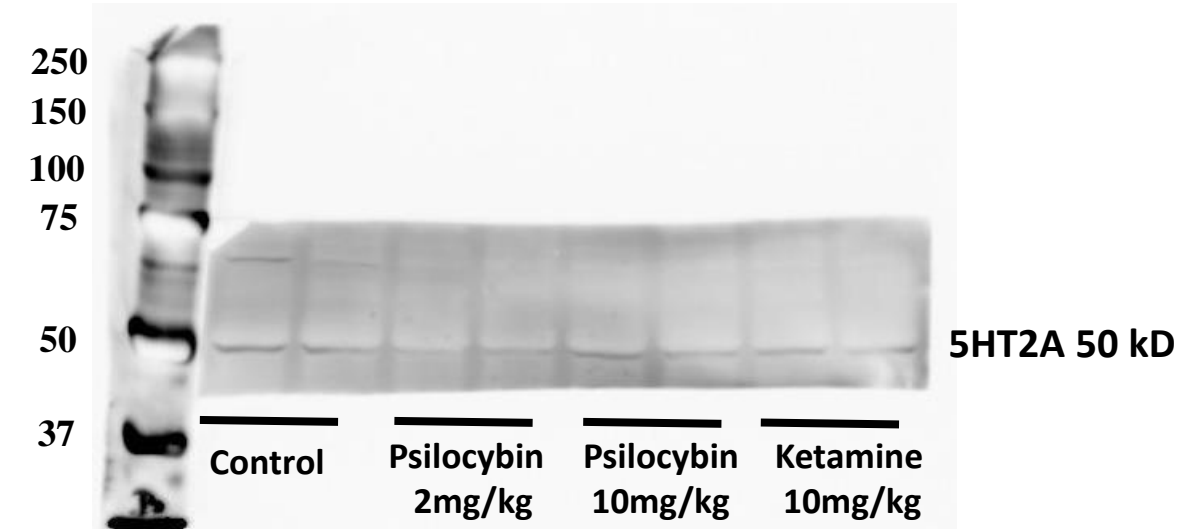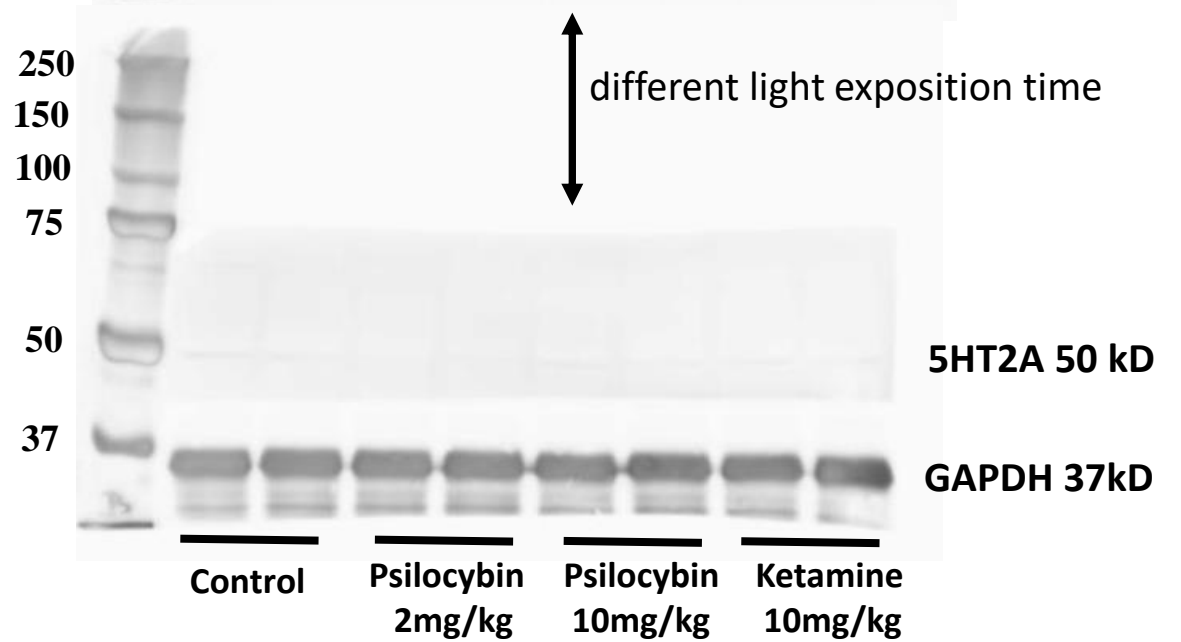

5HT2A

C blot

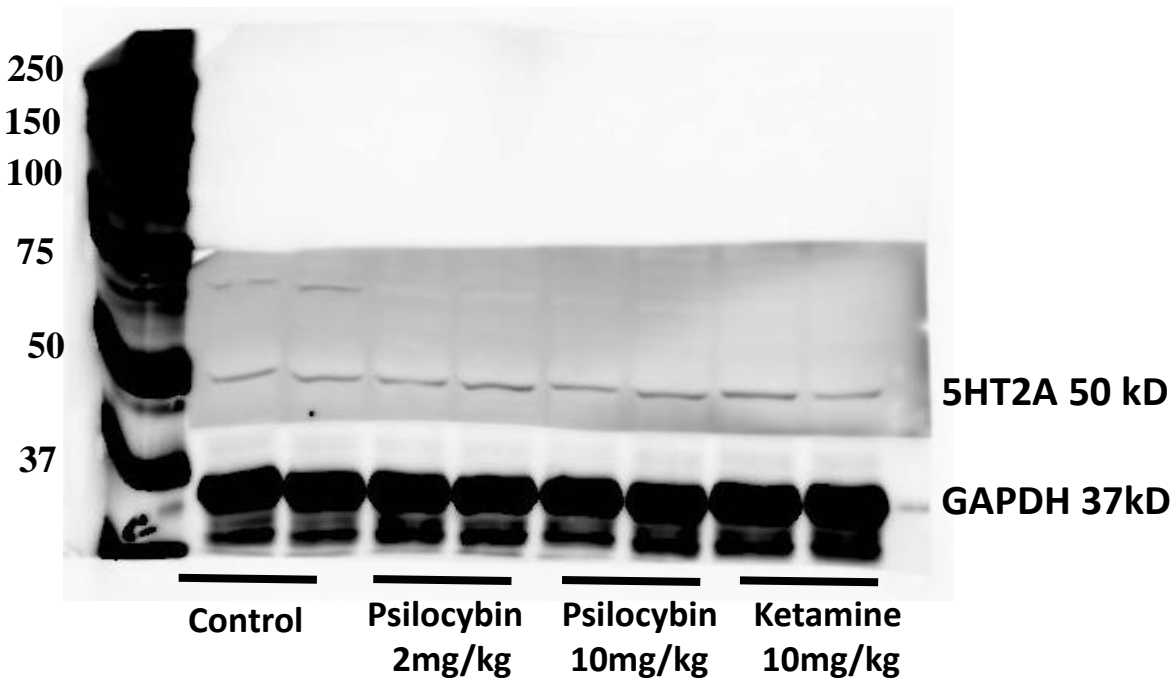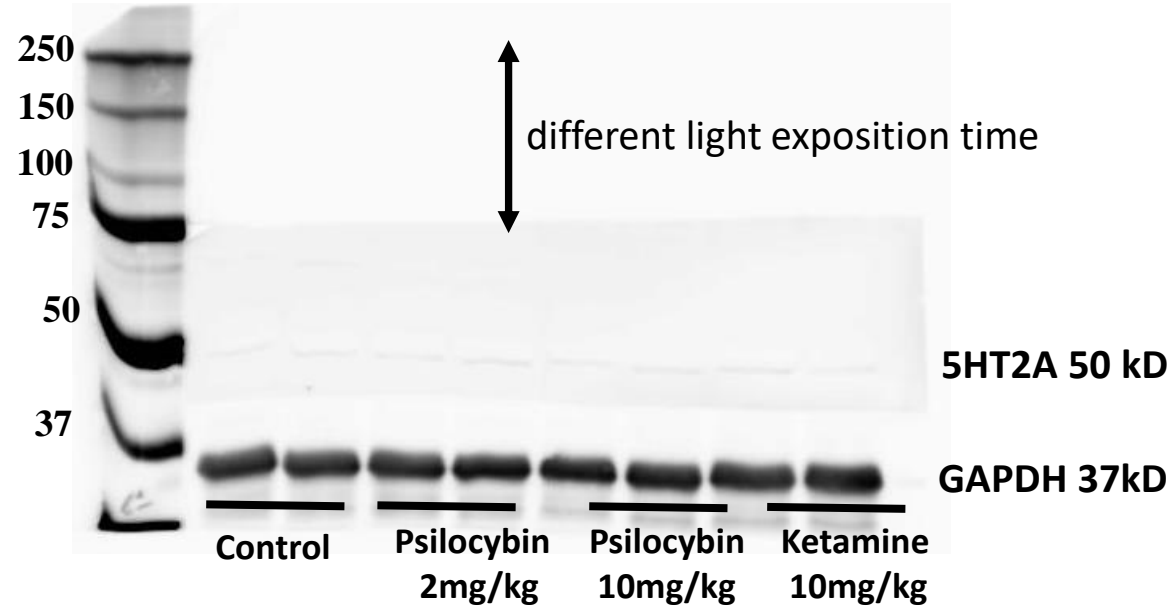

HIPPOCAMPUS

D blot

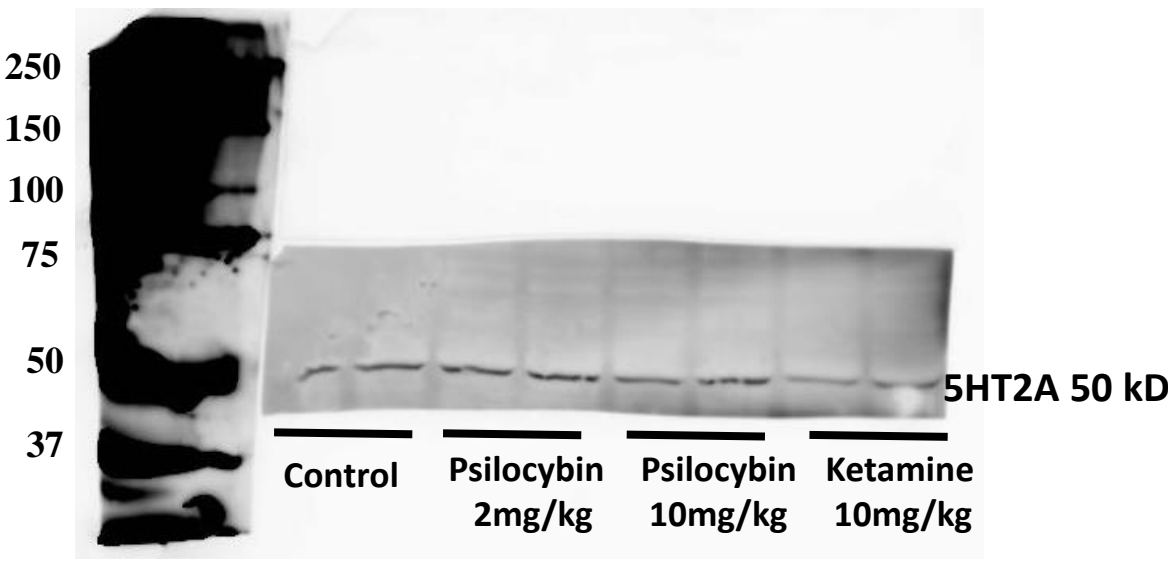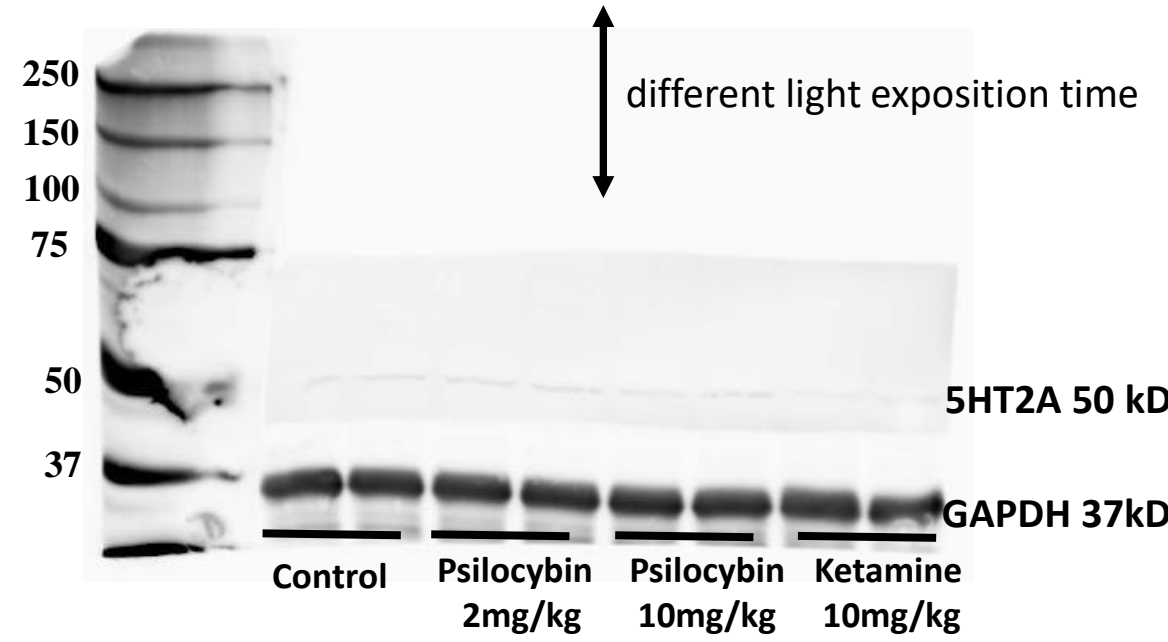

# Nucleus Accumbens

## 5HT2A

A blot

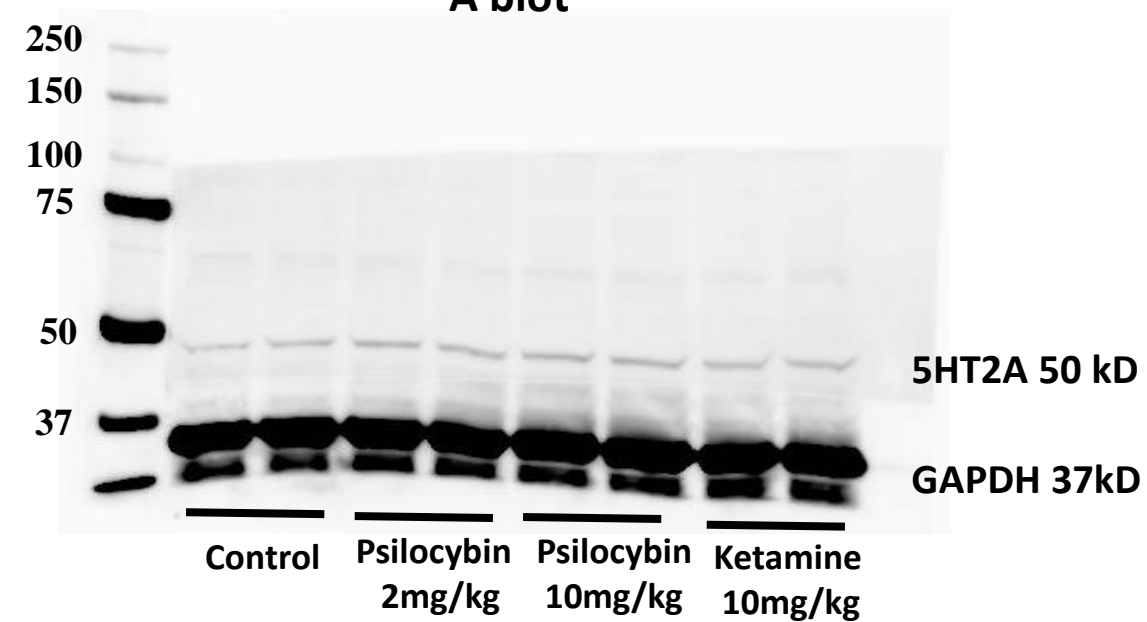

B blot

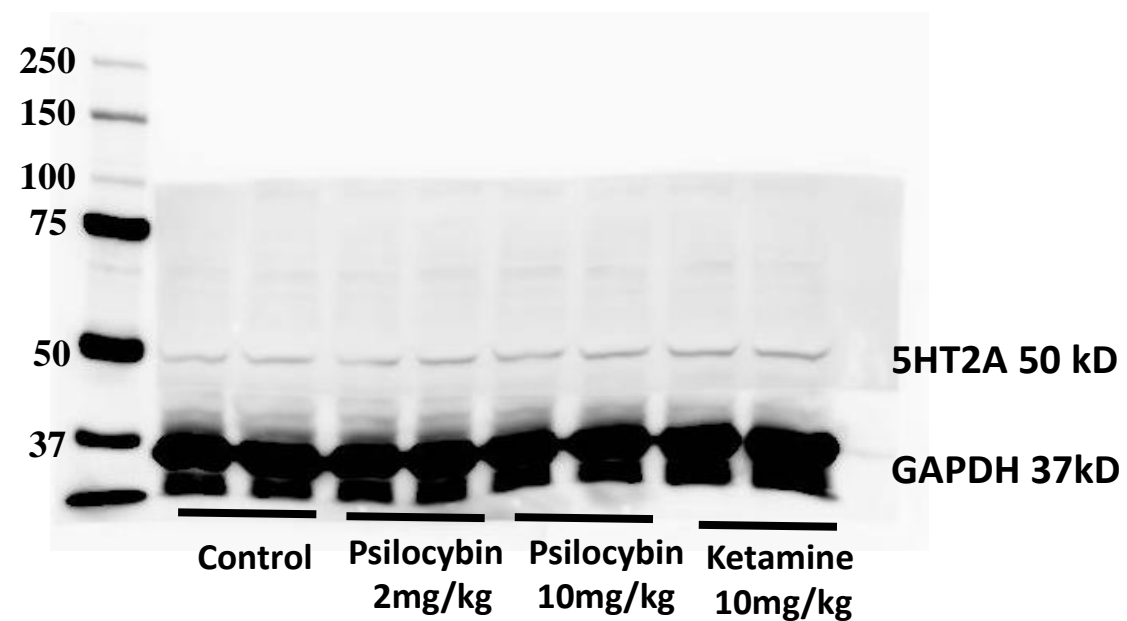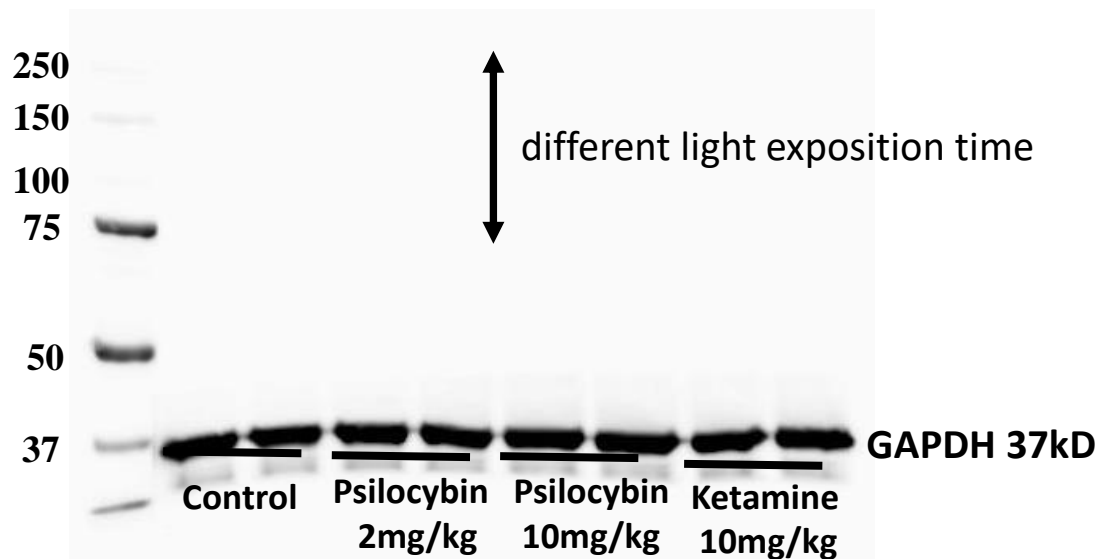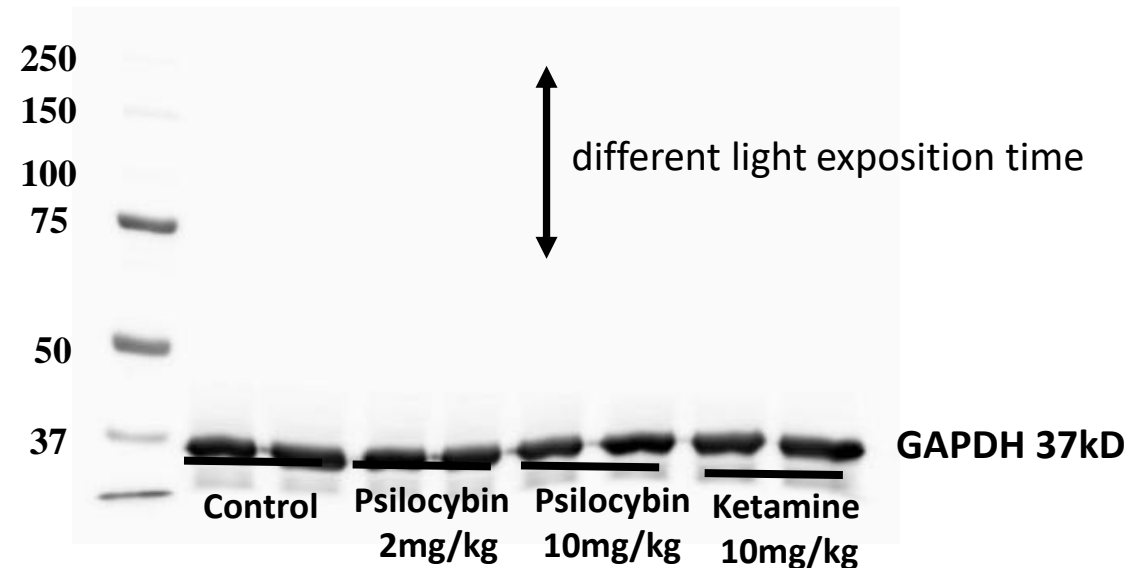

# Nucleus Accumbens

5HT2A

C blot

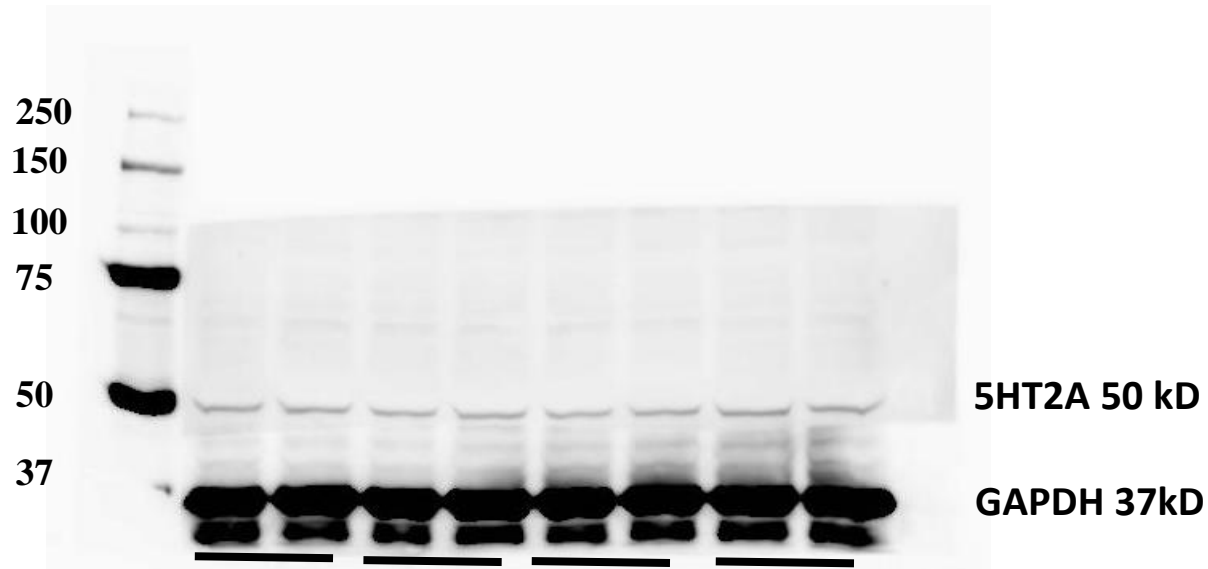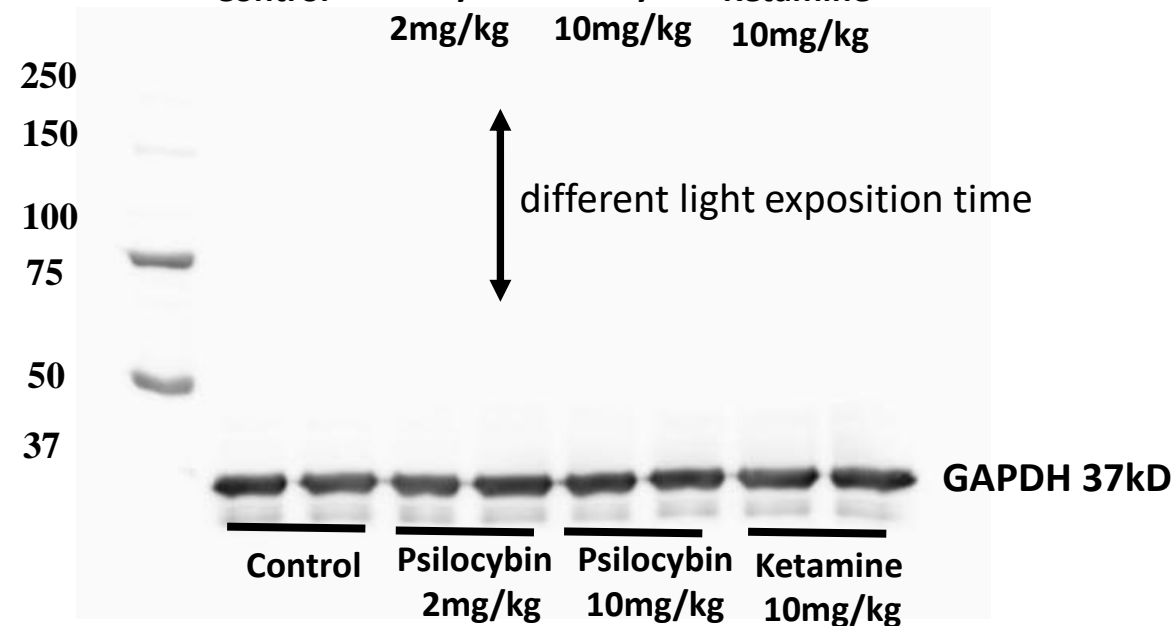

D blot (this blot in publication)

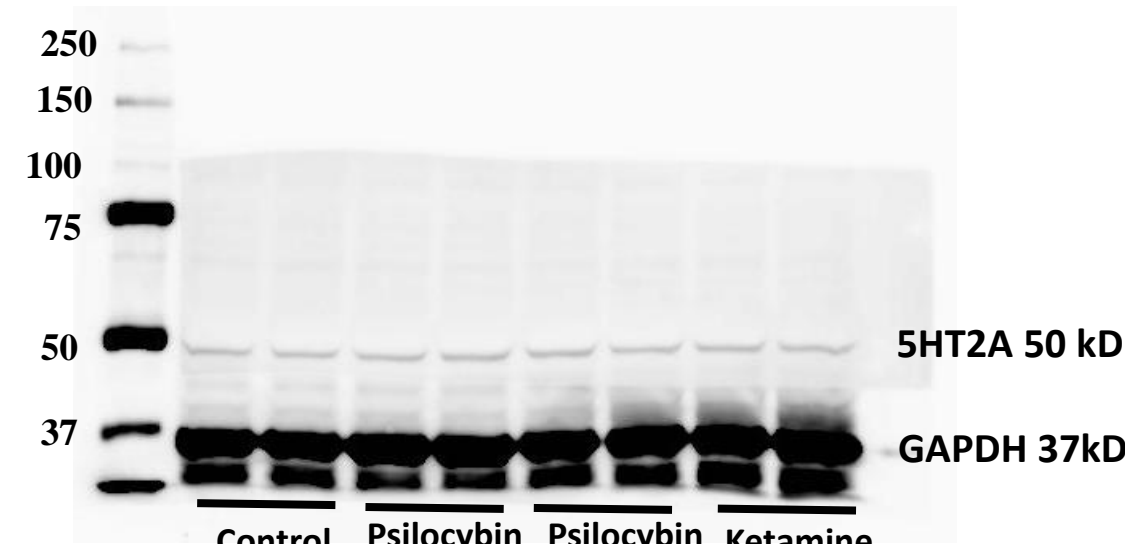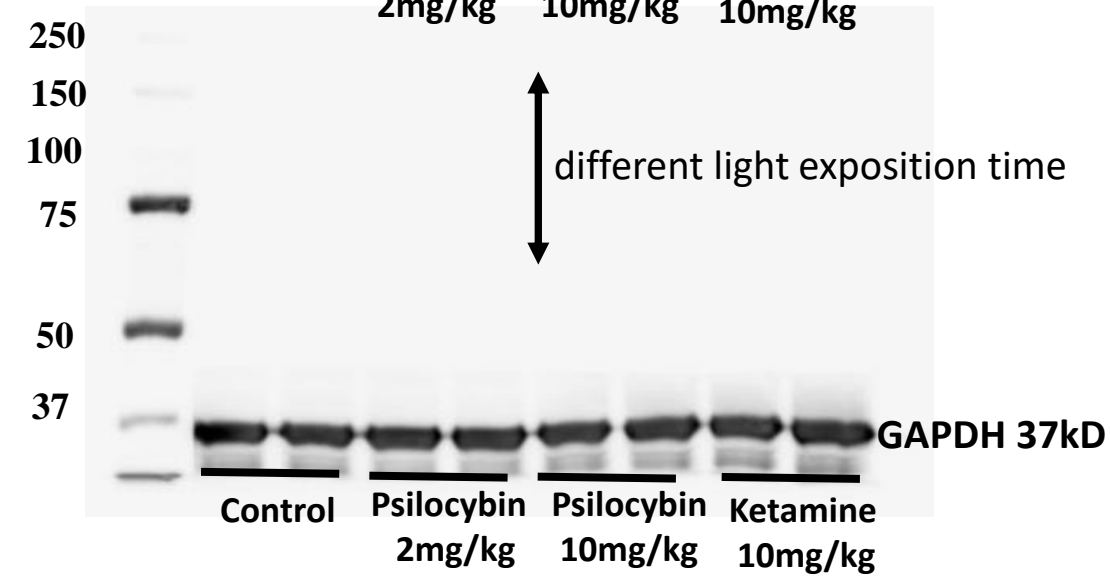

**D2**

**Nucleus Accumbens**

**A blot**

**B blot**

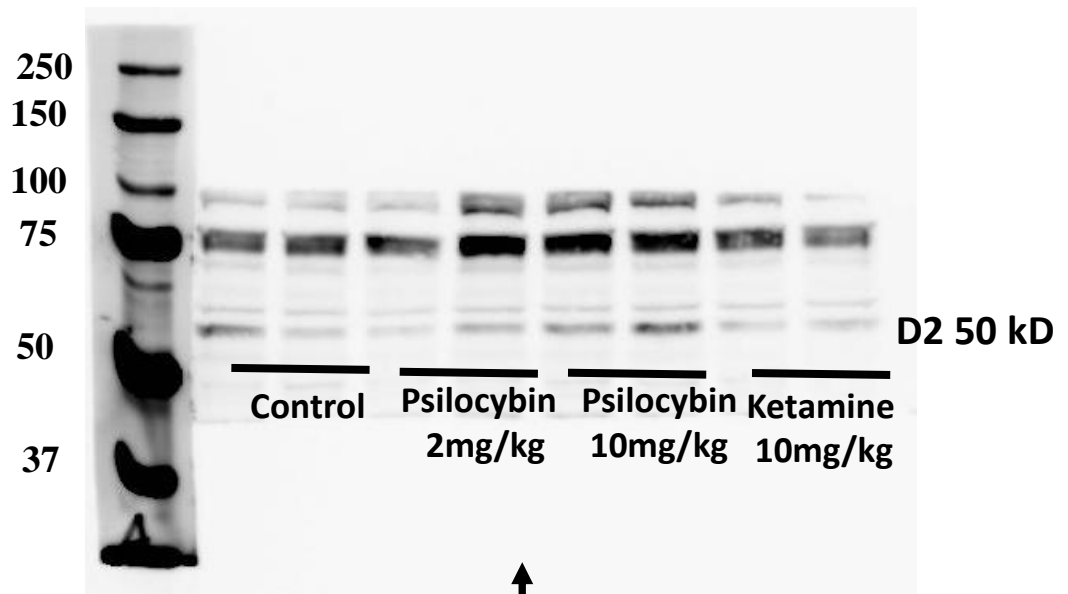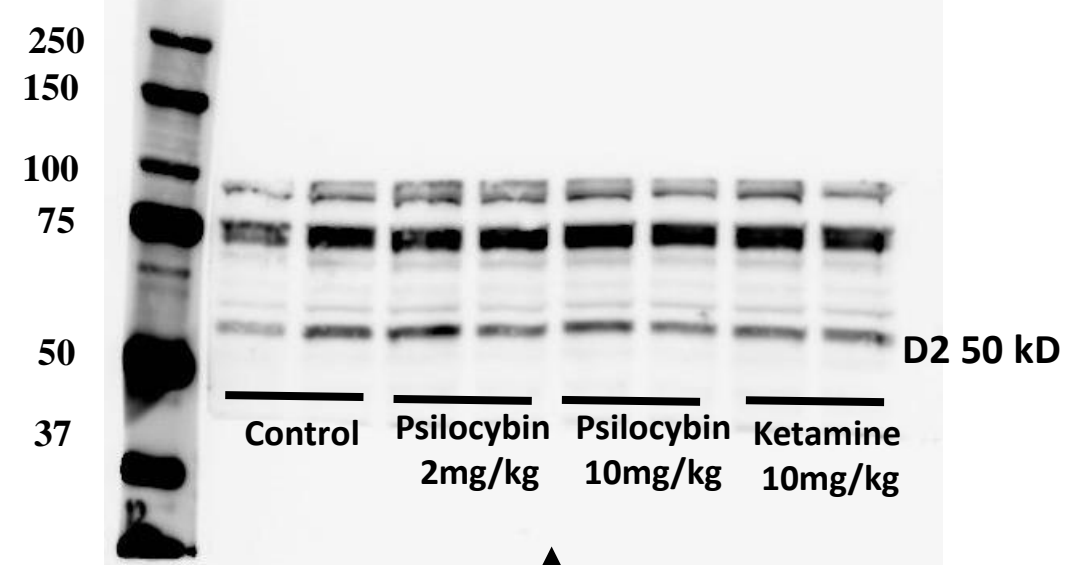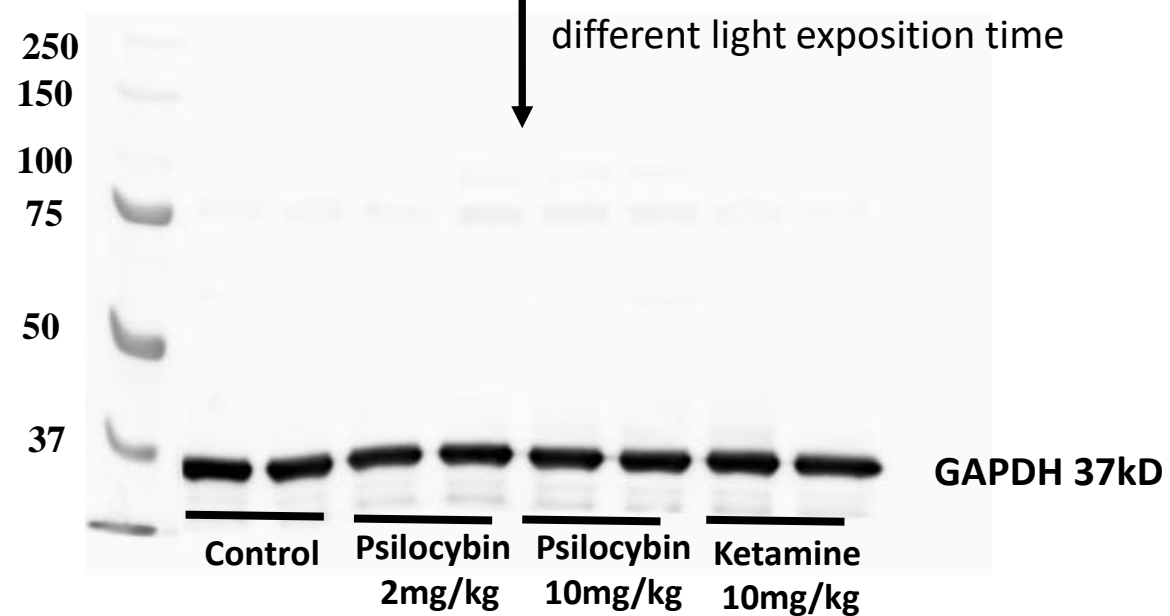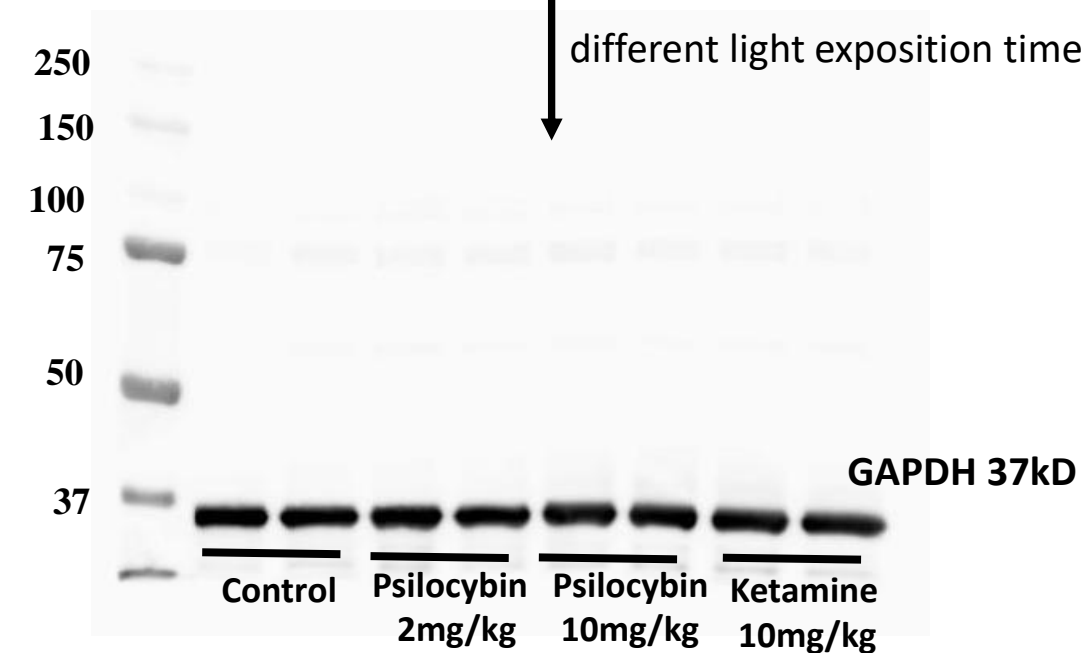

# Nucleus Accumbens

C blot (this blot in publication)

D blot

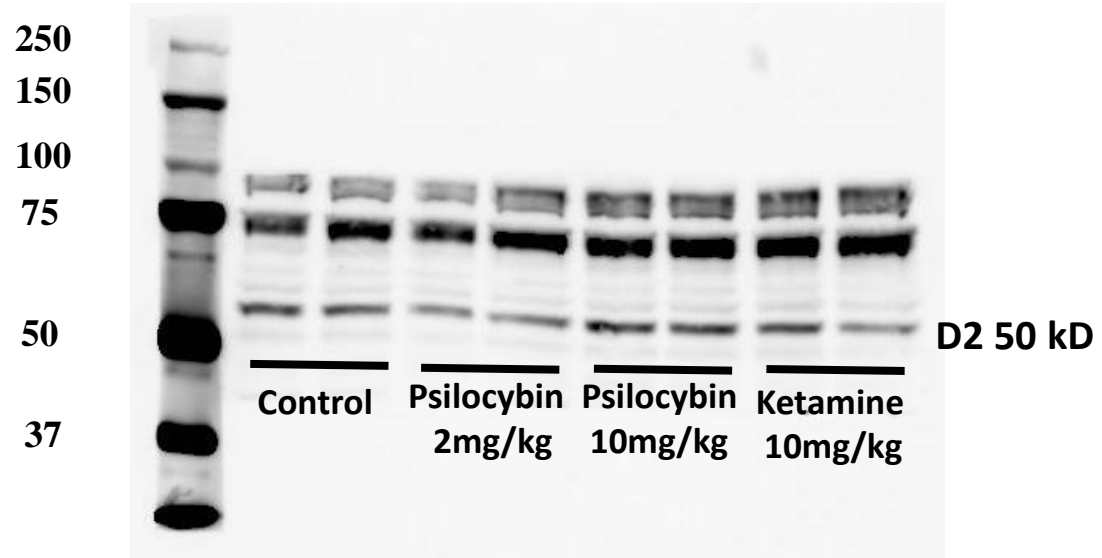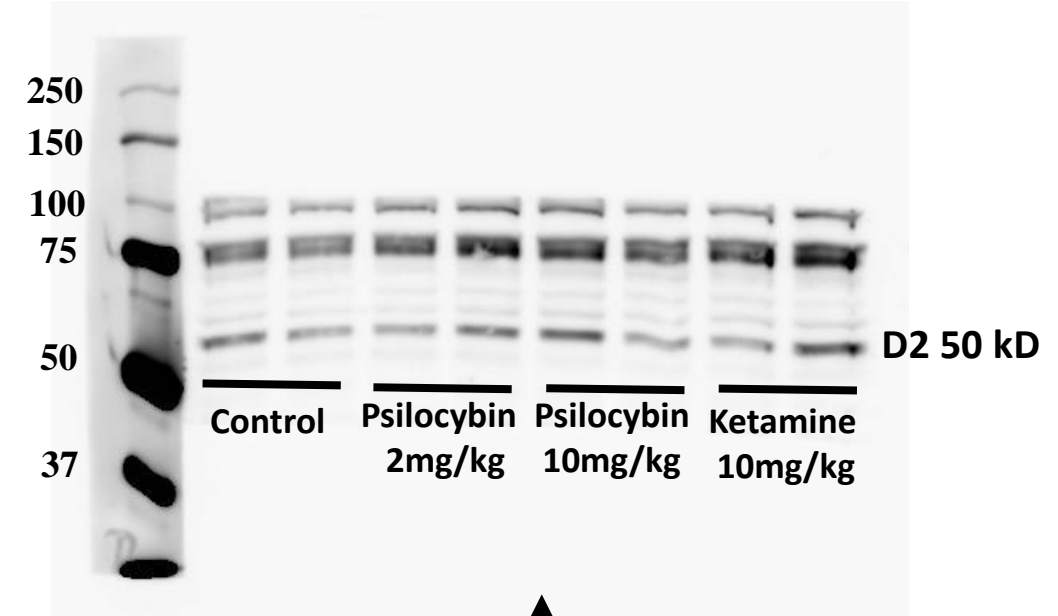

different light exposition time

different light exposition time

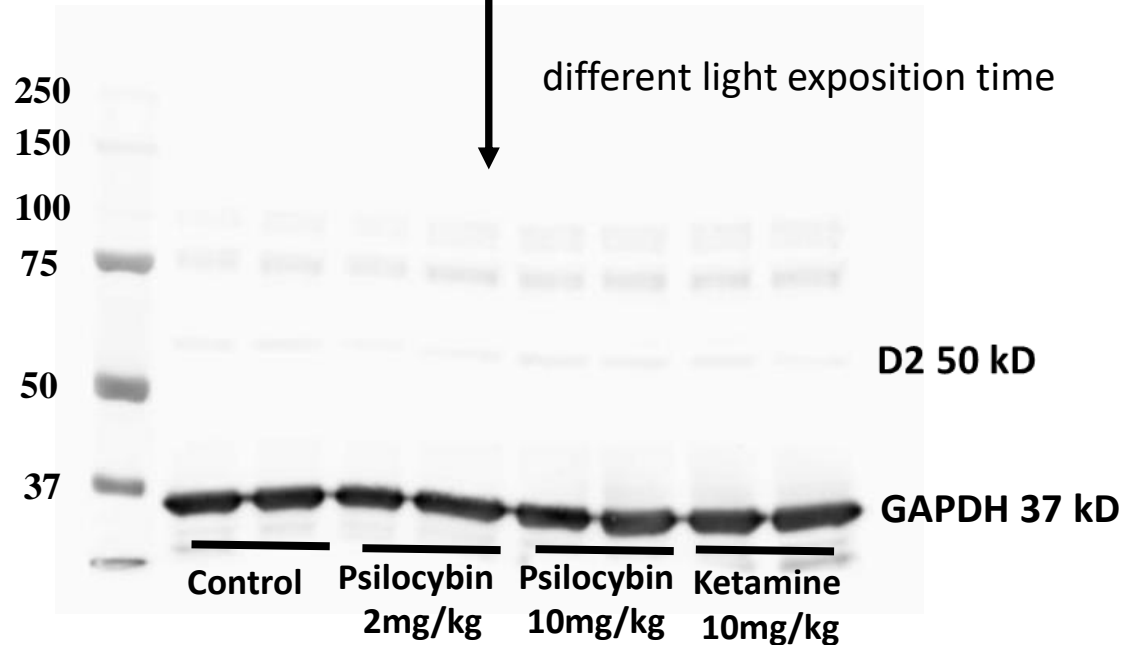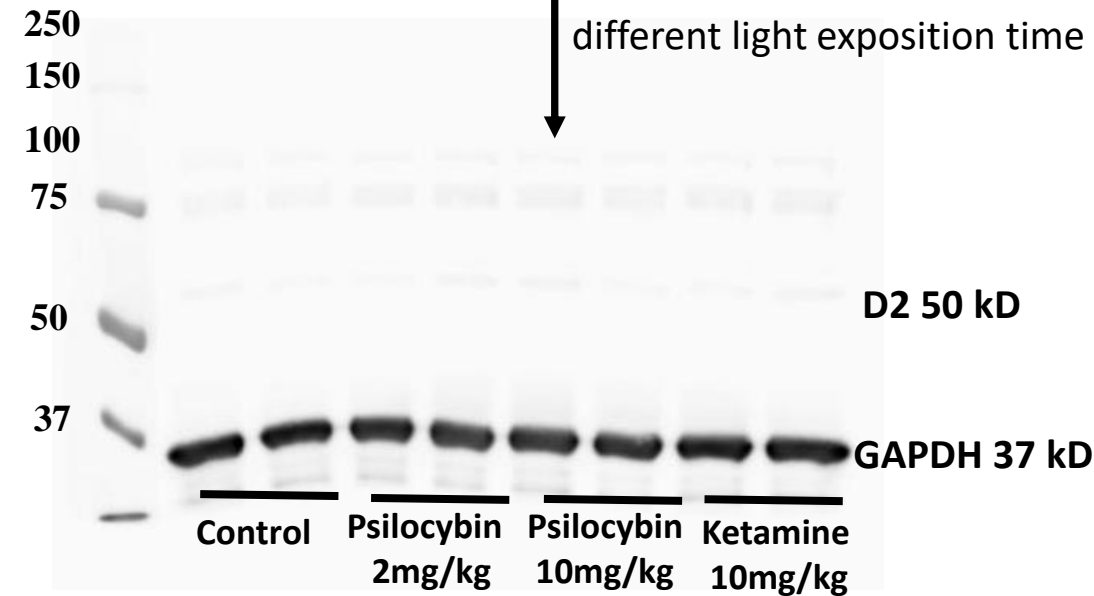

Supplement: Supplementary file 1 [file supplementary › supplementary material 1.pdf]
