# Supplementary material for: Limbic System Response to Psilocybin and Ketamine Administration in Rats: A Neurochemical and Behavioral Study
Source: Preprints.org preprint supplement (doi:10.20944/preprints202309.1649.v1), 2023-09-25
Supplement: Supplementary file 1 [file supplementary]

Archive with 3 entries (3 files):
- supplementary material 1.pdf
- Supplementary material 2.pdf
- Supplementary material 3.pdf
