# Supplementary material for: Limbic System Response to Psilocybin and Ketamine Administration in Rats: A Neurochemical and Behavioral Study
Source: Preprints.org preprint supplement (doi:10.20944/preprints202309.1649.v1), 2023-09-25
Supplement: Supplementary file 1 [file supplementary › Supplementary material 3.pdf]

### Supplementary materials 3

Table 1S. Basal levels of neurotransmitters in treatment groups

| Treatment                | DA (pg/10 $\mu$ l) | 5-HT (pg/10 $\mu$ l) | GLU (ng/10 $\mu$ l) | GABA (pg/10 $\mu$ l) | ACh (nM)        |
|--------------------------|--------------------|----------------------|---------------------|----------------------|-----------------|
| <b>Nucleus accumbens</b> |                    |                      |                     |                      |                 |
| control                  | 0.89 $\pm$ 0.05    | 0.26 $\pm$ 0.02      | 7.82 $\pm$ 0.83     | 43.36 $\pm$ 2.43     | nd              |
| Psilocybin 2 mg/kg       | 0.86 $\pm$ 0.09    | 0.26 $\pm$ 0.02      | 7.72 $\pm$ 0.88     | 47.95 $\pm$ 4.99     | nd              |
| Psilocybin 10 mg/kg      | 0.85 $\pm$ 0.09    | 0.29 $\pm$ 0.03      | 7.70 $\pm$ 1.41     | 39.2 $\pm$ 2.26      | nd              |
| Ketamine 10 mg/kg        | 0.99 $\pm$ 0.04    | 0.22 $\pm$ 0.02      | 8.21 $\pm$ 0.81     | 44.68 $\pm$ 5.33     | nd              |
| <b>Hippocampus</b>       |                    |                      |                     |                      |                 |
| control                  | nd                 | nd                   | 5.54 $\pm$ 0.41     | 42.97 $\pm$ 2.05     | 0.37 $\pm$ 0.06 |
| Psilocybin 2 mg/kg       | nd                 | nd                   | 5.34 $\pm$ 0.62     | 35.89 $\pm$ 2.77     | 0.30 $\pm$ 0.09 |
| Psilocybin 10 mg/kg      | nd                 | nd                   | 6.60 $\pm$ 0.49     | 49.72 $\pm$ 2.98     | 0.37 $\pm$ 0.16 |
| Ketamine 10 mg/kg        | nd                 | nd                   | 4.77 $\pm$ 0.50     | 45.98 $\pm$ 3.79     | 0.43 $\pm$ 0.06 |
| <b>Amygdala</b>          |                    |                      |                     |                      |                 |
| control                  | nd                 | nd                   | 4.38 $\pm$ 0.30     | 48 $\pm$ 2.82        | nd              |
| Psilocybin 2 mg/kg       | nd                 | nd                   | 4.77 $\pm$ 0.51     | 44.5 $\pm$ 3.31      | nd              |
| Psilocybin 10 mg/kg      | nd                 | nd                   | 4.19 $\pm$ 0.48     | 49.0 $\pm$ 5.73      | nd              |
| Ketamine 10 mg/kg        | nd                 | nd                   | 4.08 $\pm$ 0.57     | 52.0 $\pm$ 4.9       | nd              |
